# Supplementary material for: Lipoprotein(a) and Its Autoantibodies in Association with Calcific Aortic Valve Stenosis
Source: MDPI journal article supplement (doi:10.3390/diseases11010043), 2023-03-03
Supplement: s1 [file s1]

Table S1. Multiple regression analysis of different parameters associated with aortic valve stenosis.

| Parameter                             | Model 1               | Model 2               | Model 3               | Model 4               | Model 5               |
|---------------------------------------|-----------------------|-----------------------|-----------------------|-----------------------|-----------------------|
| Lipoprotein(a)                        | 1.03<br>(1.01 - 1.04) | 1.02<br>(1.00 - 1.03) | 1.02<br>(1.00 - 1.03) | 1.02<br>(1.00 - 1.04) | 1.02<br>(1.00 - 1.04) |
| autoAbs IgM                           | -                     | 0.87<br>(0.81 - 0.93) | 0.88<br>(0.82- 0.95)  | 0.84<br>(0.76 - 0.92) | 0.81<br>(0.71 - 0.92) |
| Age                                   | -                     | -                     | 1.11<br>(1.07 - 1.16) | 1.11<br>(1.06 - 1.16) | 1.15<br>(1.08 - 1.22) |
| Type 2 diabetes                       | -                     | -                     | -                     | 1.82<br>(1.04 - 3.19) | 1.95<br>(1.04 - 3.67) |
| AUC                                   | 0.68                  | 0.74                  | 0.85                  | 0.88                  | 0.87                  |
| Percent of cases correctly classified | 68.31%                | 75.59%                | 82.16%                | 83.08%                | 79.58%                |

The logistic model included: Model 1 - Lipoprotein(a); Model 2 - Lipoprotein(a) and autoantibodies against oxidised Lipoprotein(a); Model 3 - Lipoprotein(a), autoantibodies against oxidised Lipoprotein(a) and age; Model 4 - Lipoprotein(a), autoantibodies against oxidised Lipoprotein(a), age and diabetes; Model 5 - all risk factors including sex, smoking, hypertension, body mass index, LDL-C levels.

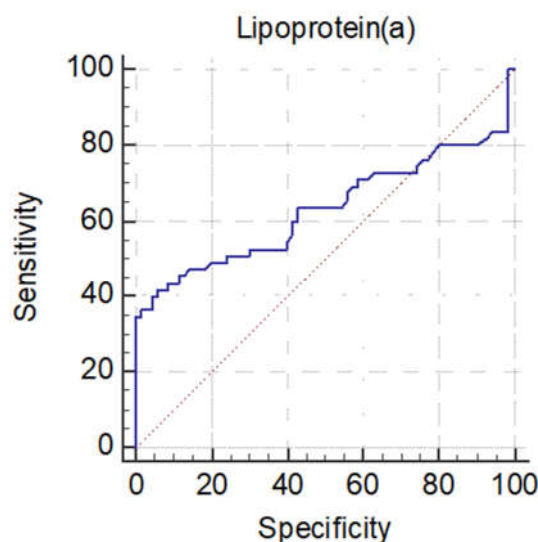

Figure S1. ROC curve analysis confirmed lipoprotein(a) serum level of 30 mg/dl as the best cut-off value for aortic valve stenosis with sensitivity – 39%, specificity – 84%, AUC – 0.63,  $p < 0.001$ .

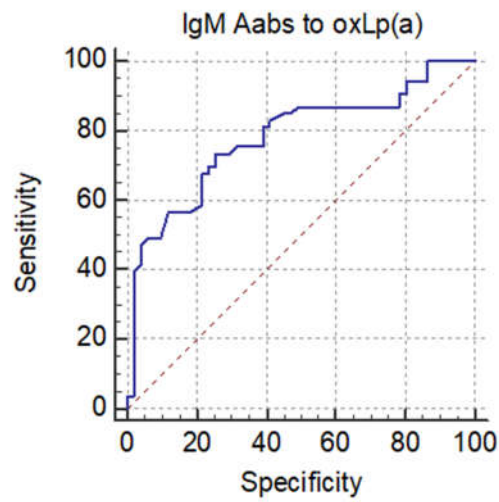

Figure S2. ROC curve analysis for IgM autoantibodies to oxidised lipoprotein(a) confirmed a level of 9.9 lab.units as the best cut-off value for aortic valve stenosis, sensitivity – 68%, specificity – 71%, AUC – 0.74,  $p < 0.001$ .
